# Supplementary material for: A novel mechanism for macrophage pyroptosis in rheumatoid arthritis induced by Pol β deficiency
Source: PubMed Central journal article supplement (PMC9259649; doi:10.1038/s41419-022-05047-6), 2022-07-06
Supplement: 41419_2022_5047_MOESM2_ESM.pdf [file 41419_2022_5047_MOESM2_ESM.pdf]

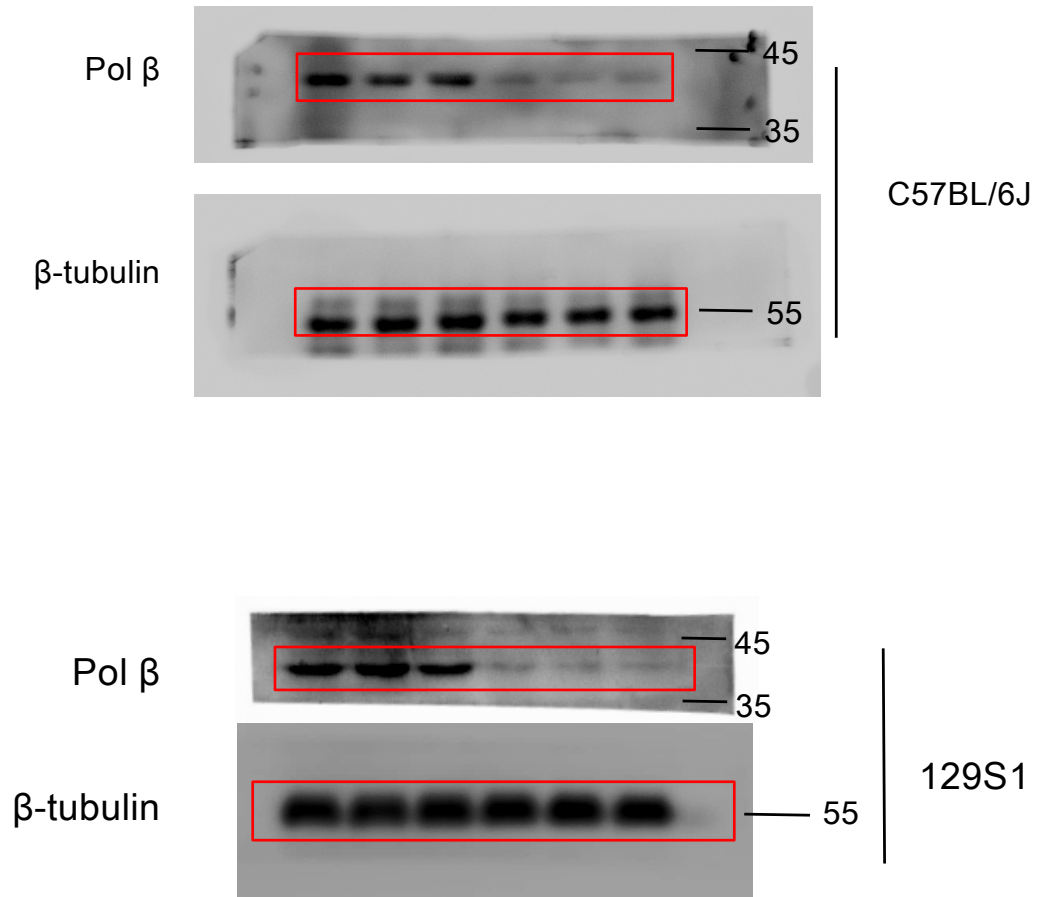

Figure 1E

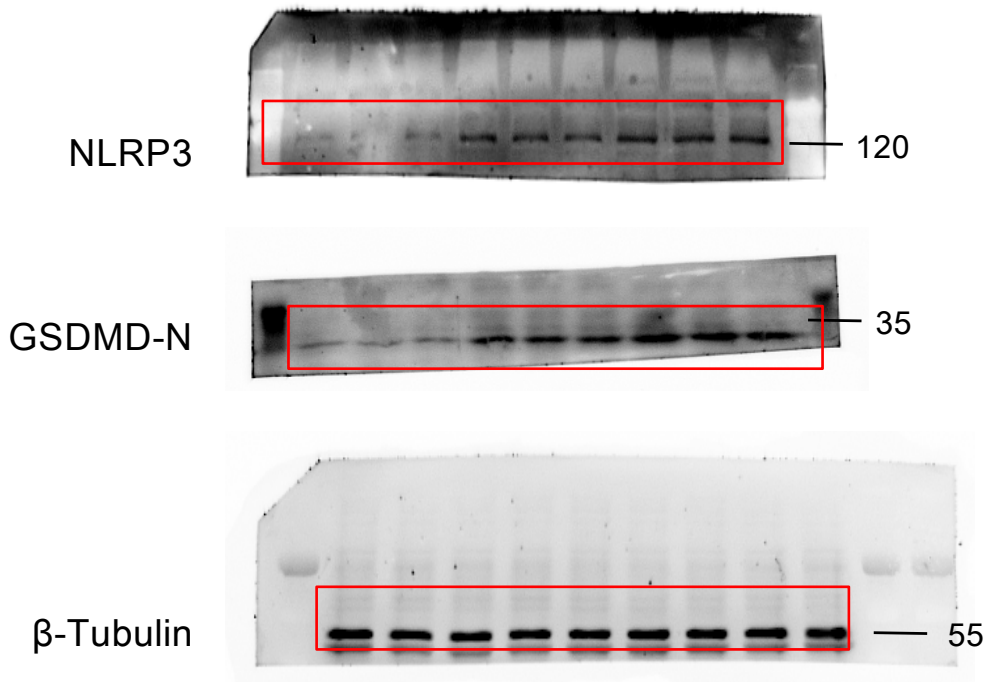

Figure 2K

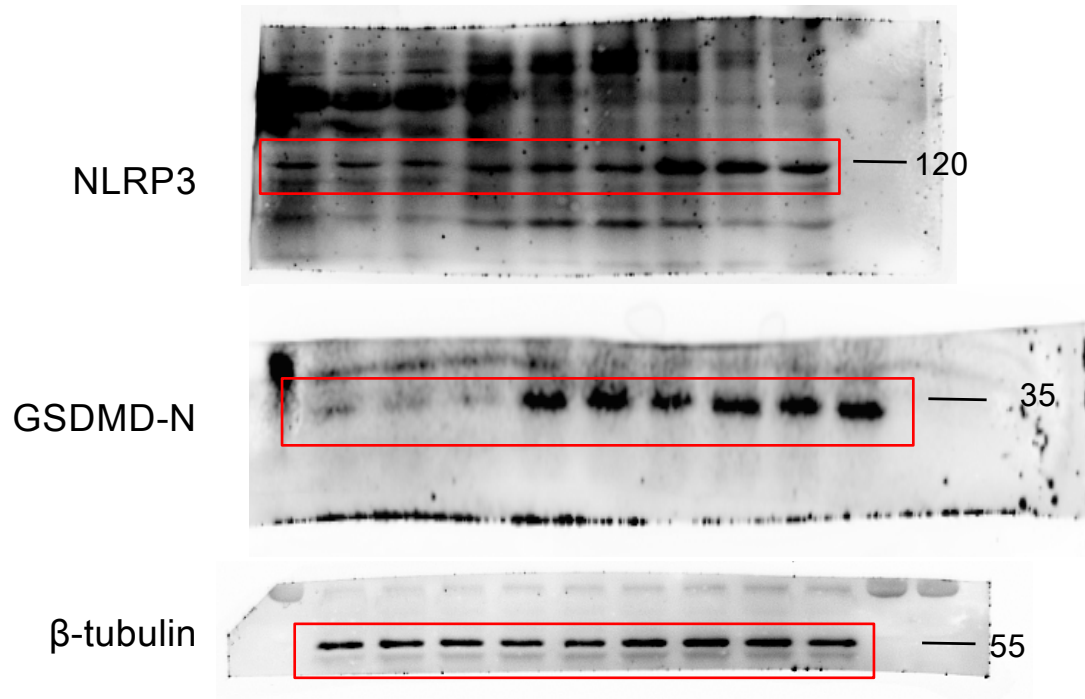

Figure 2L

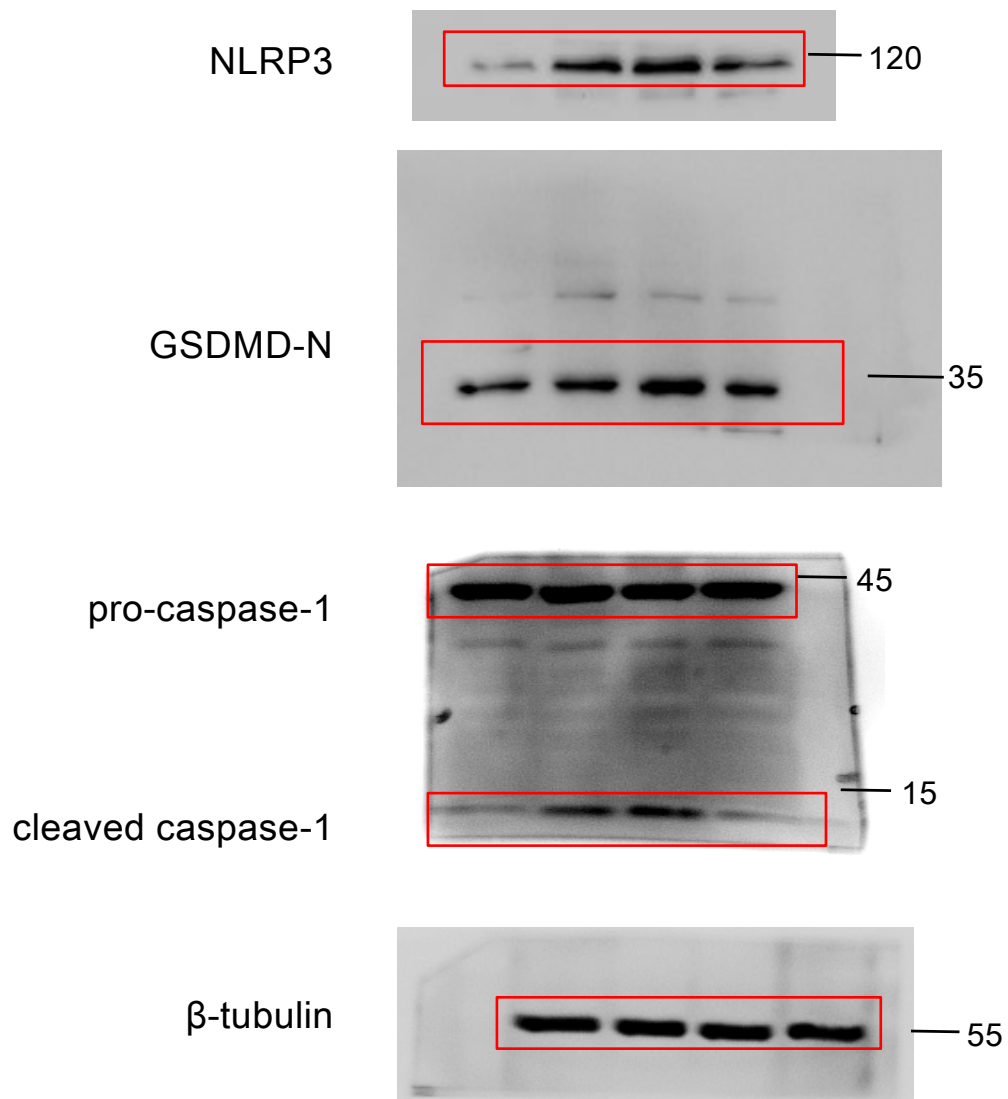

Figure 3A



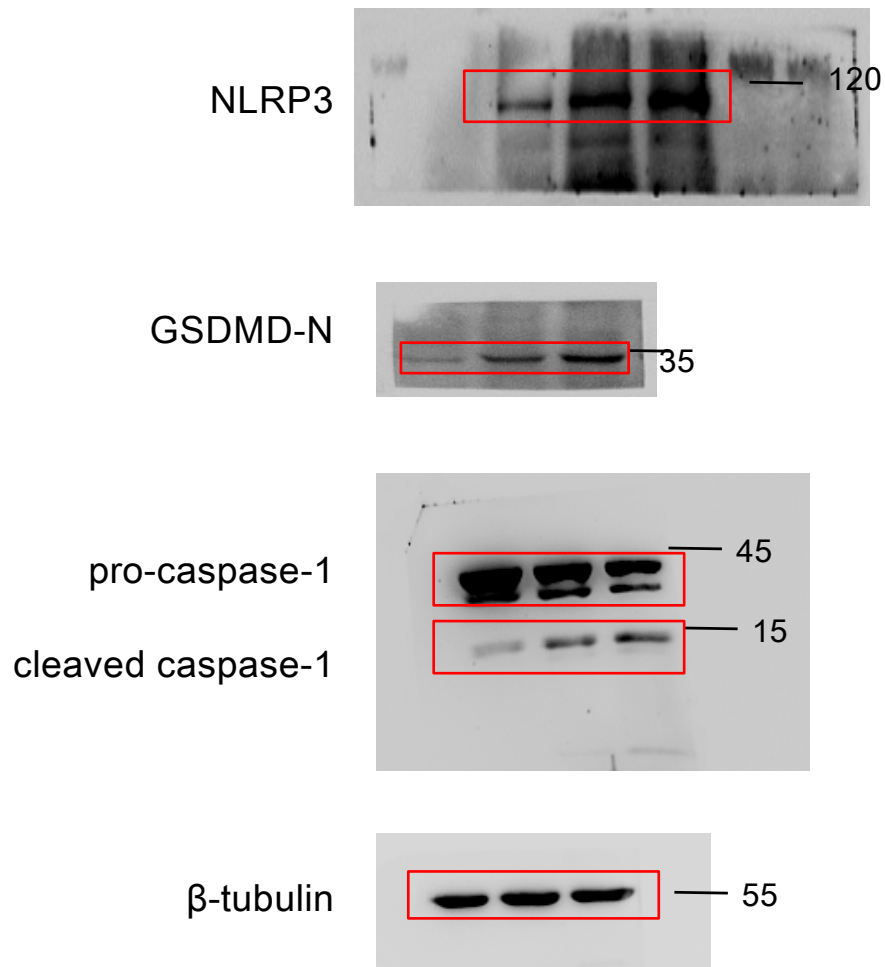

Figure 3B

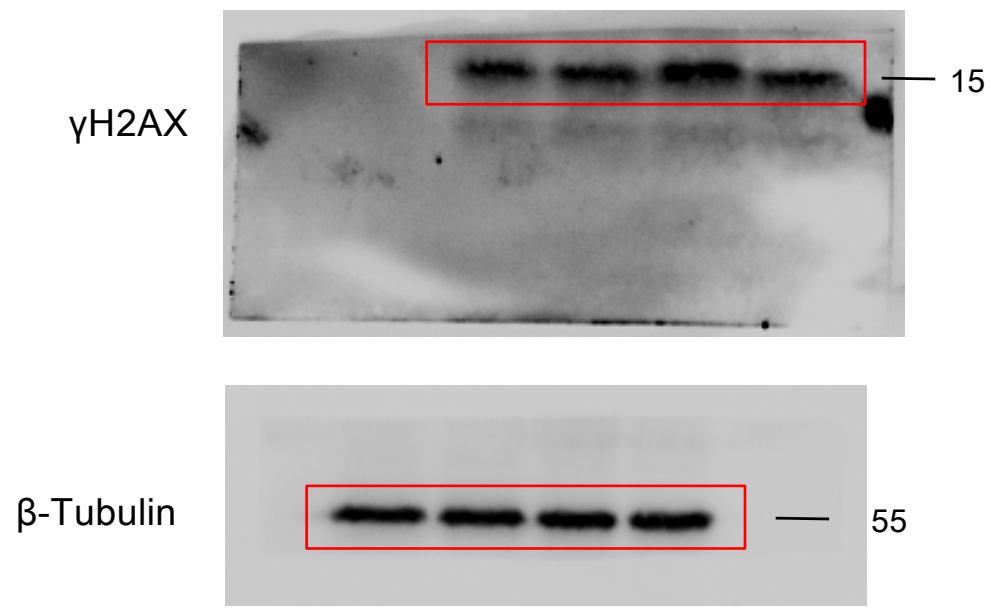

Figure 4C

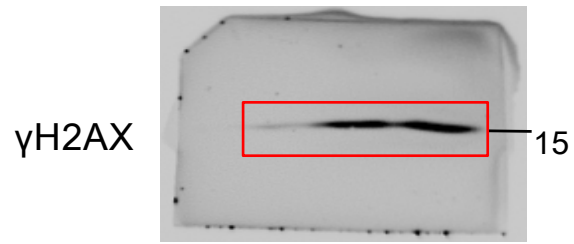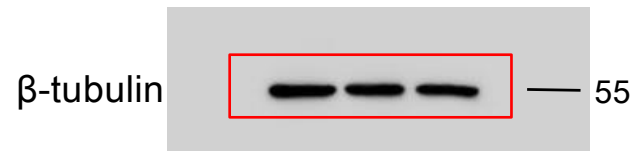

Figure 4F

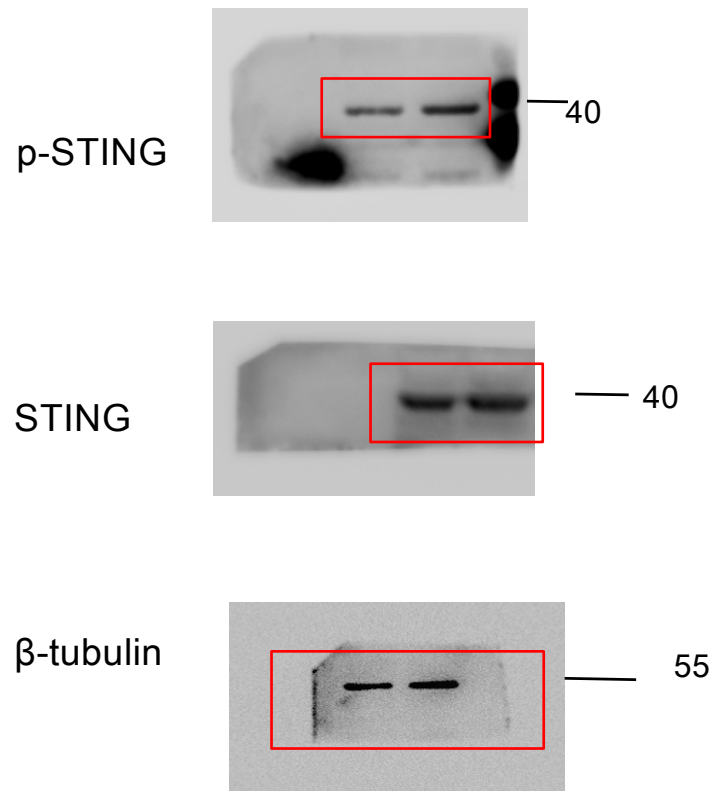

Figure 6B

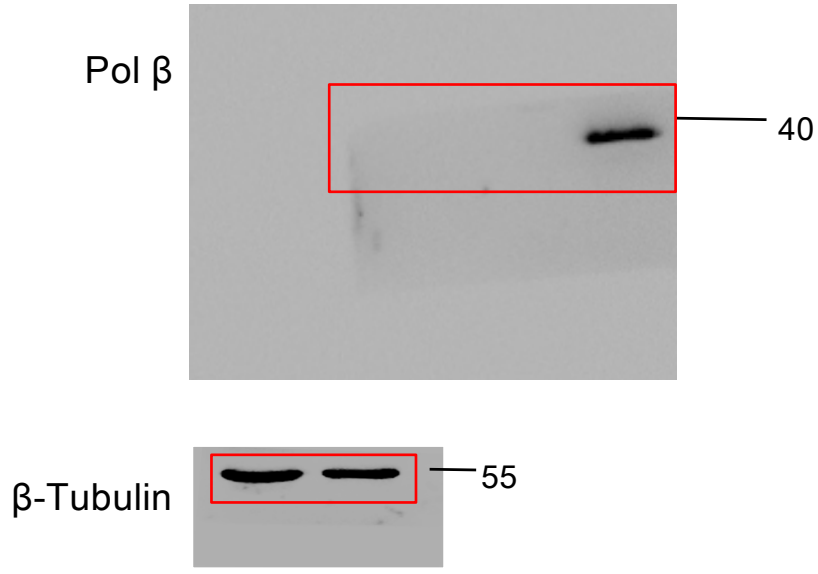

Figure 6D

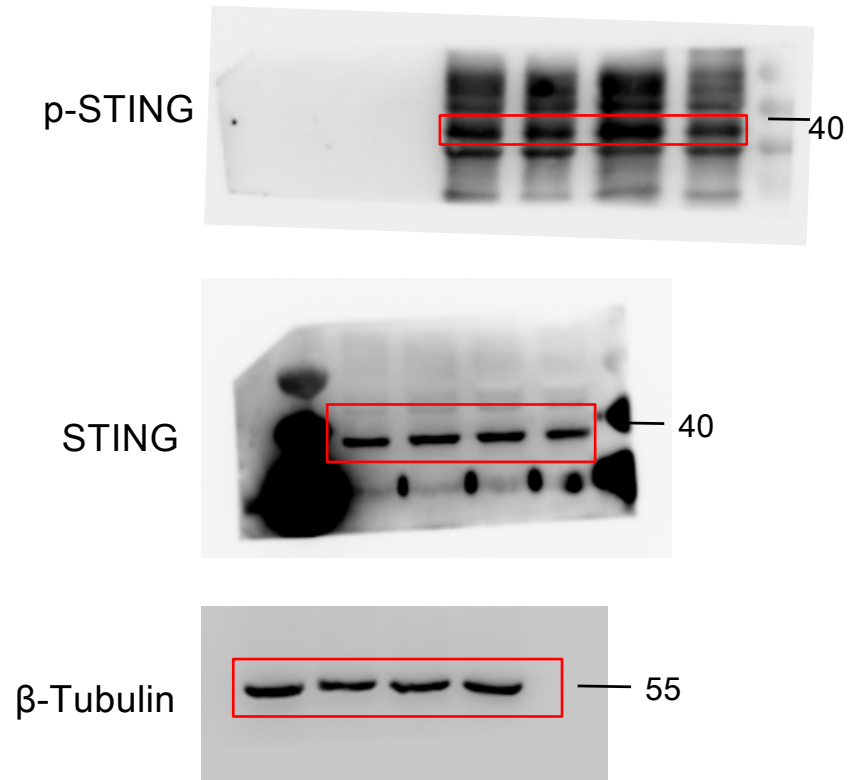

Figure 6F

STING

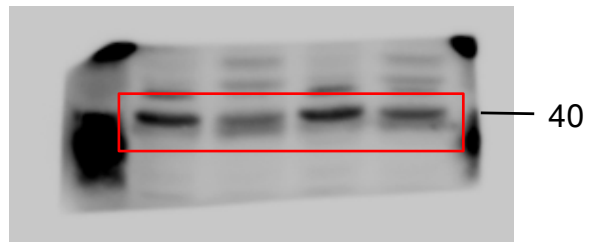

$\beta$ -Tubulin

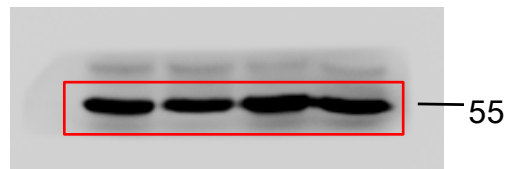

Figure 6H

Flag

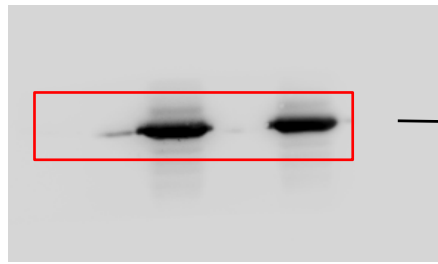

40

$\beta$ -Tubulin

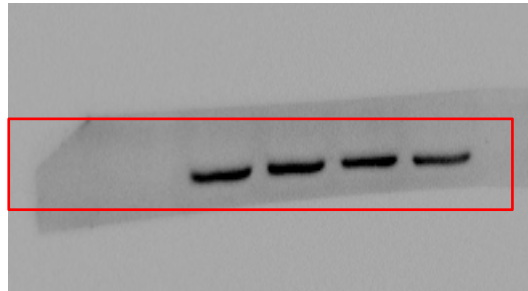

55

Figure 6J



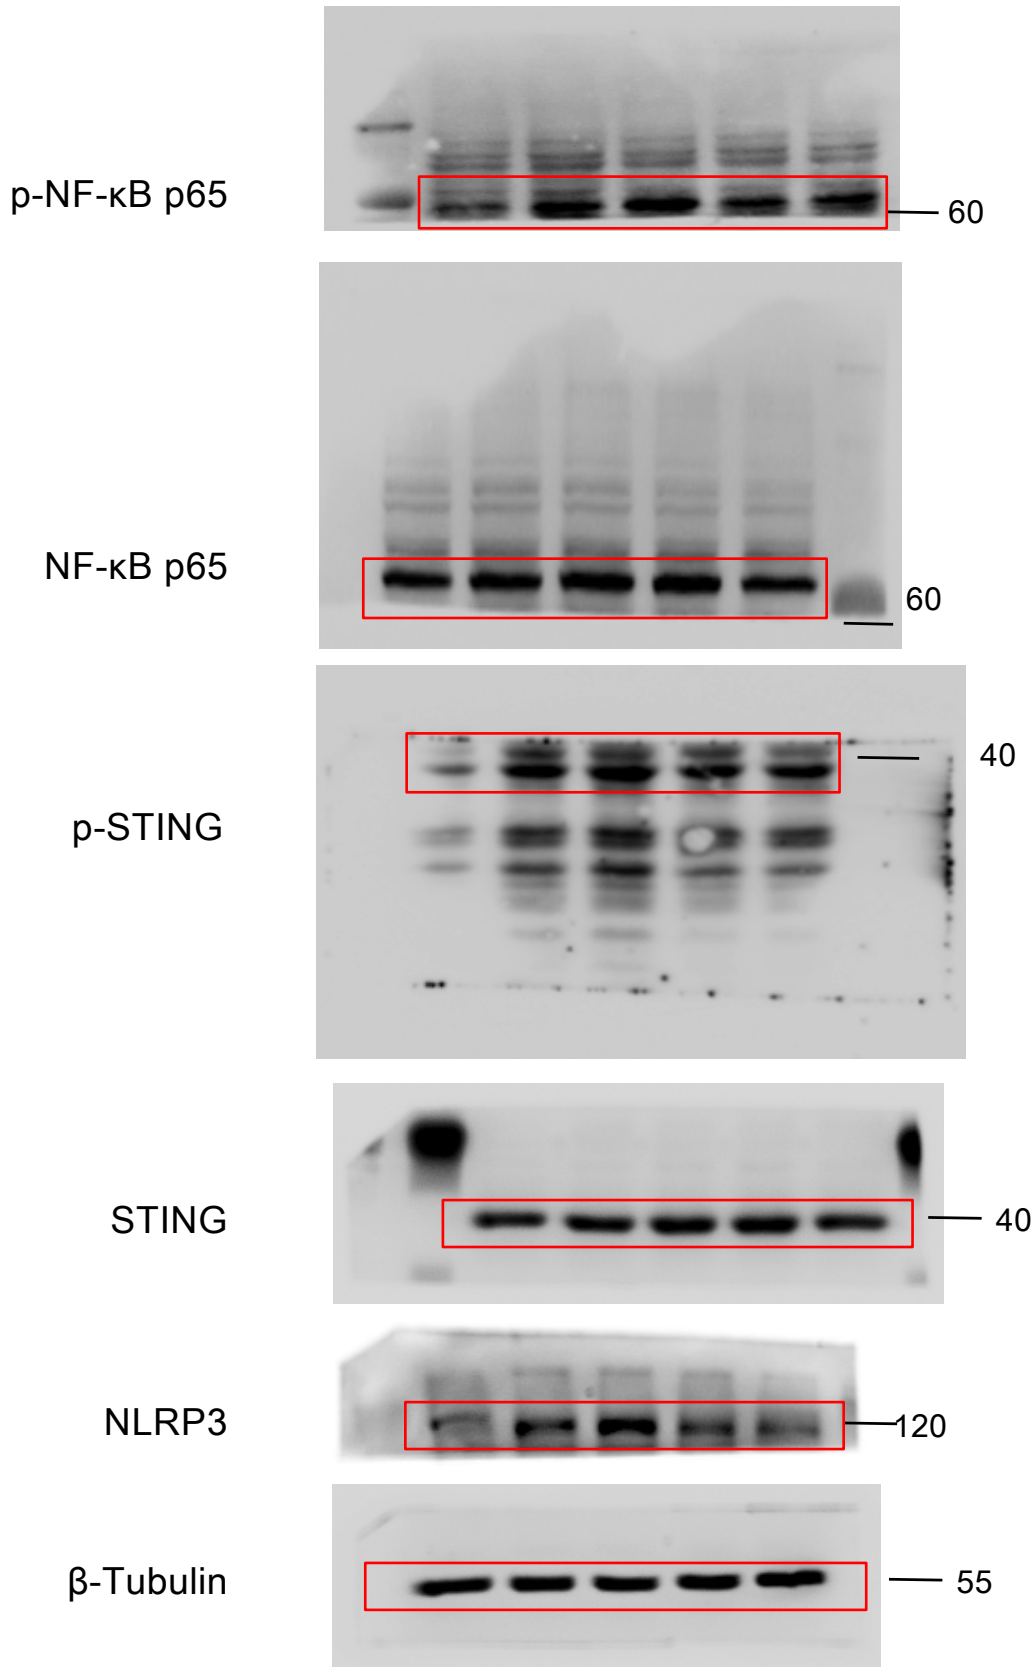

Figure 7A

p-NF-κB

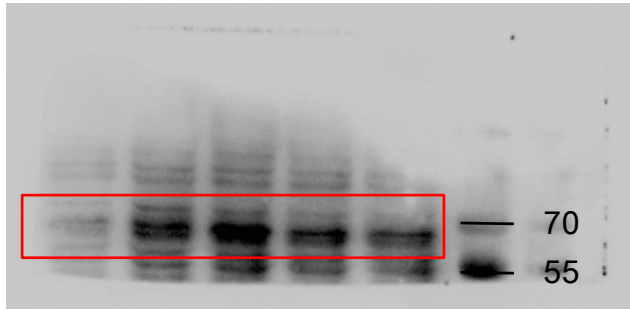

NF-κB

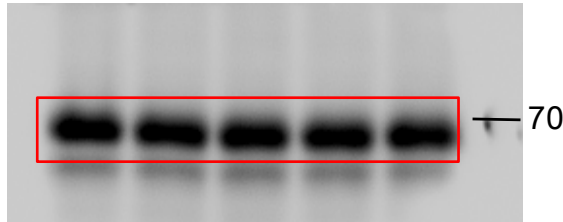

NLRP3

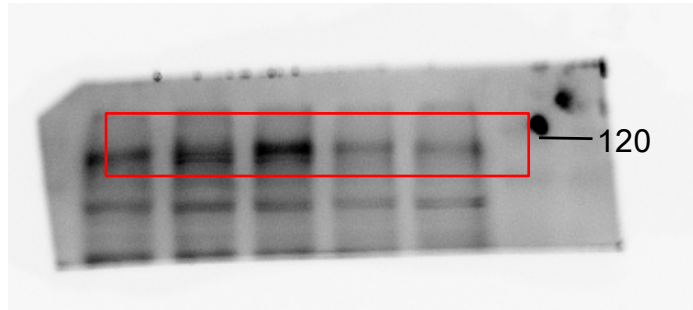

β-Tubulin

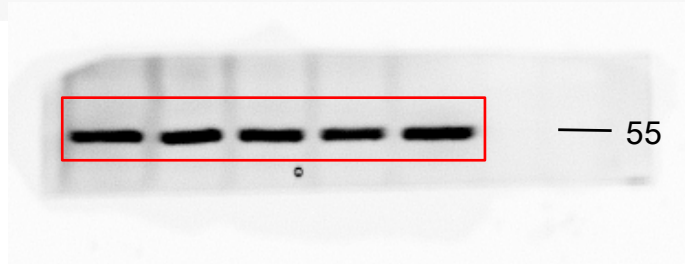

Figure 7B

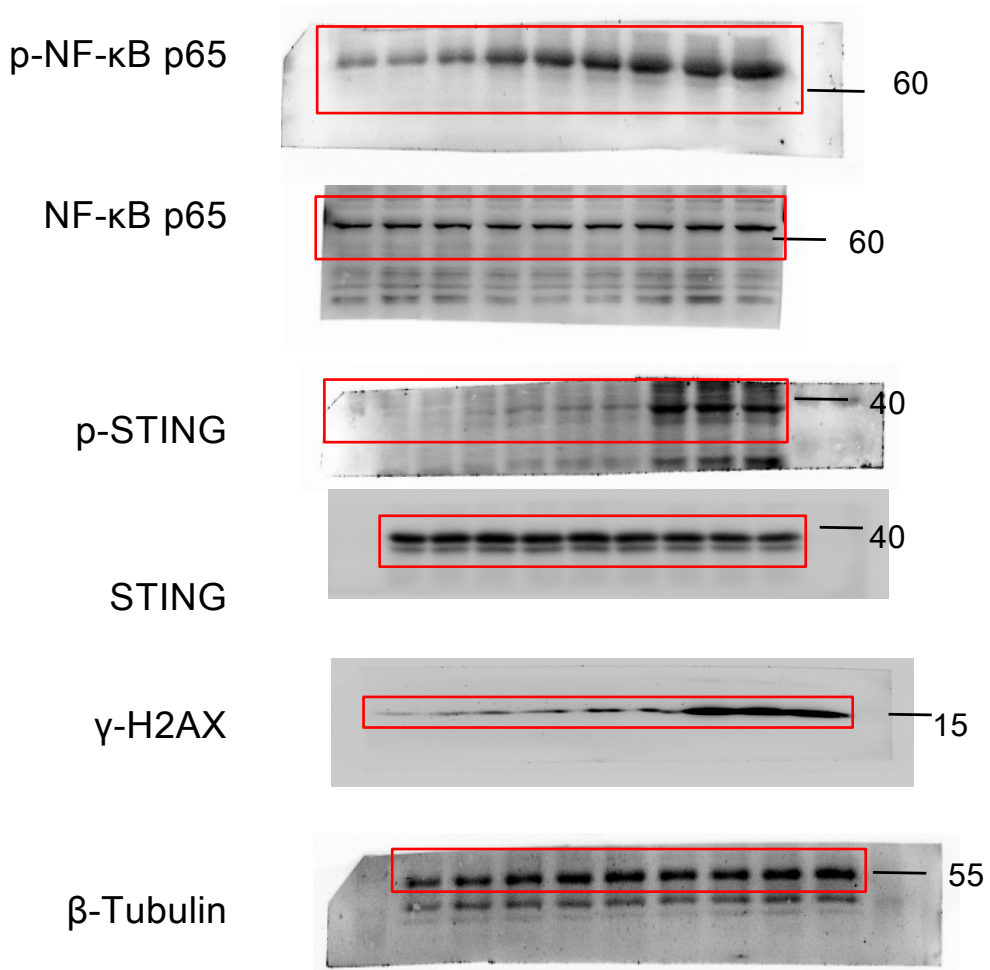

Figure 7F

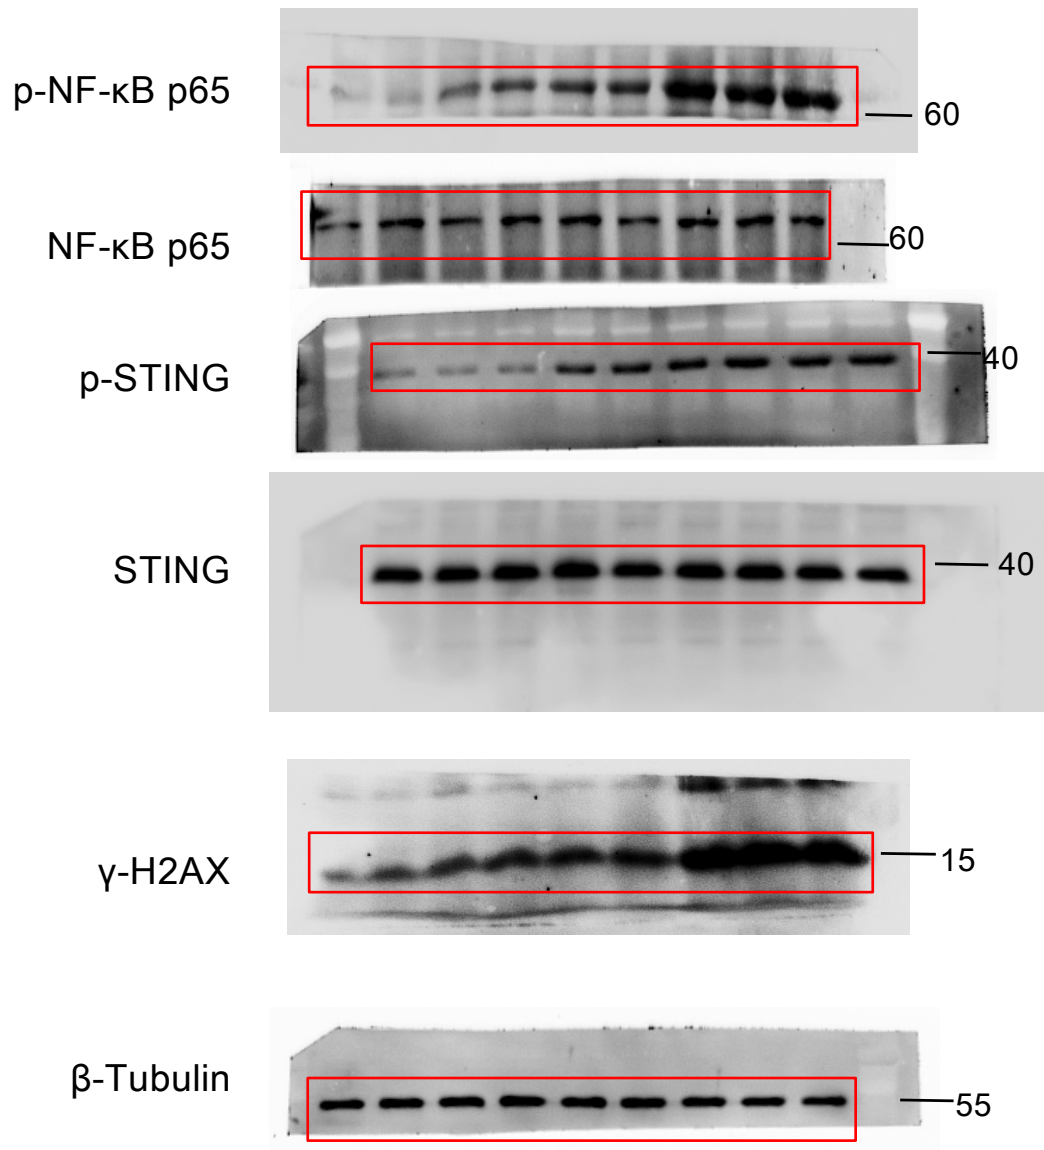

Figure 7G

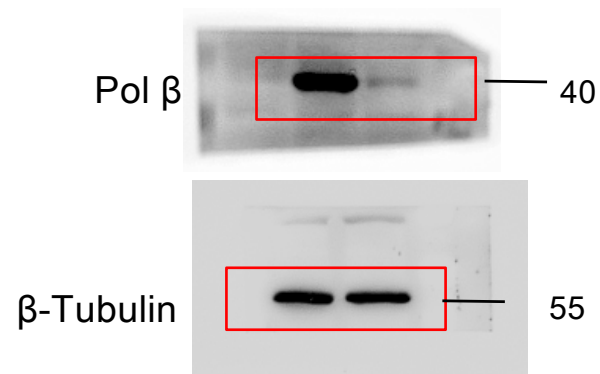

Figure S2

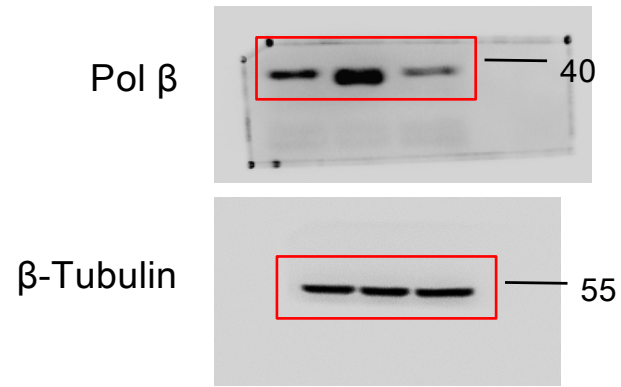

Figure S6

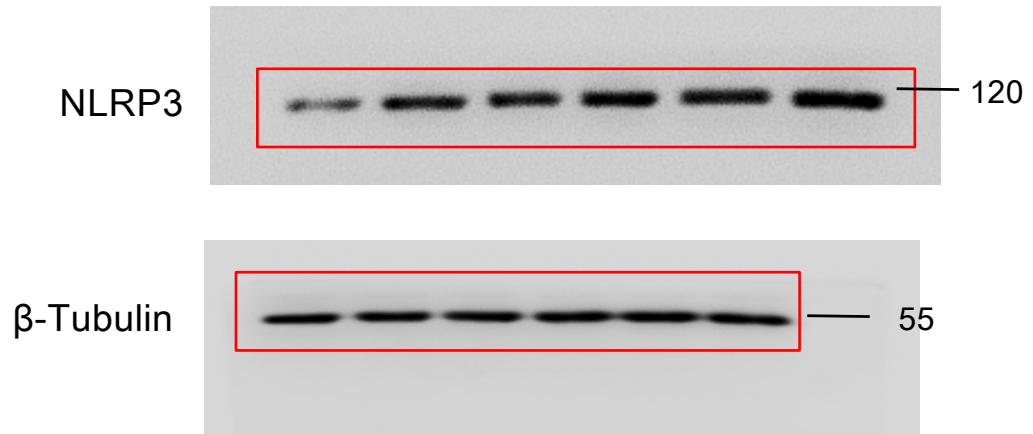

Figure S8A

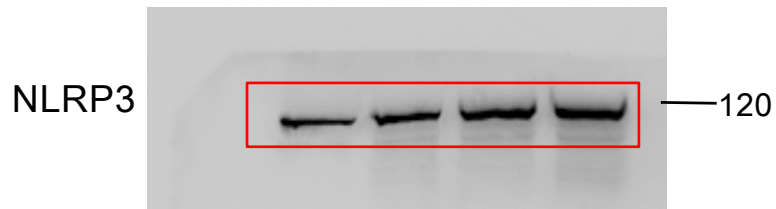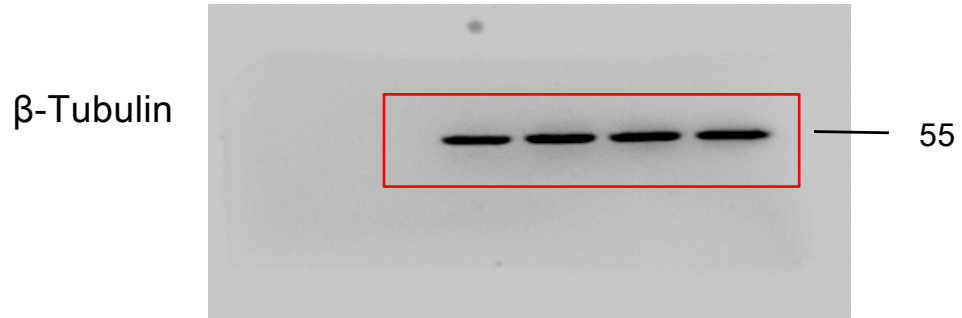

Figure S8B



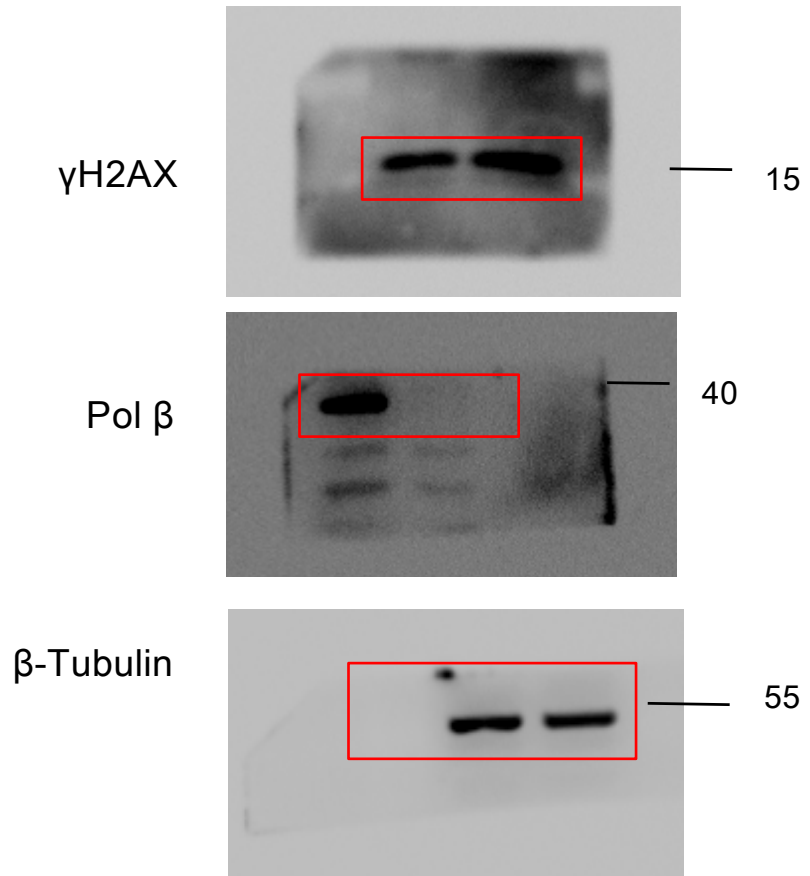

Figure S9A

p-NF- $\kappa$ B p65

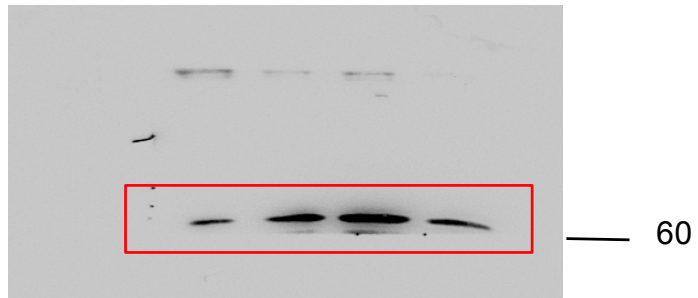

NF- $\kappa$ B p65

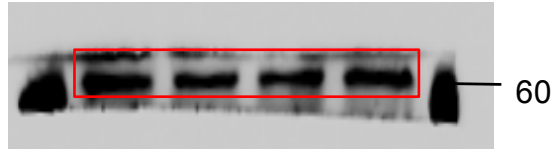

p-STING

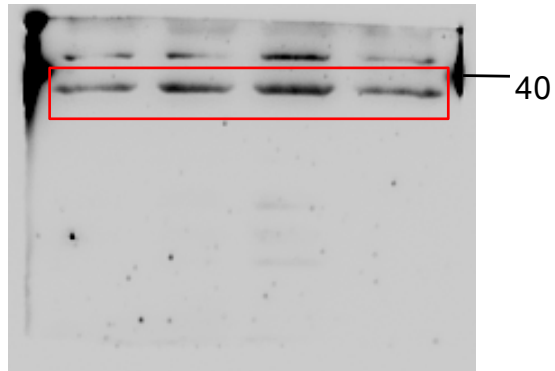

STING

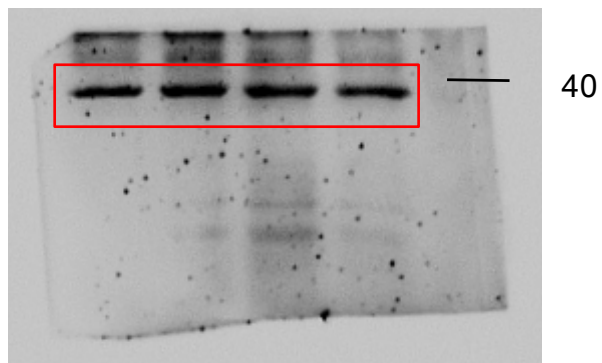

NLRP3

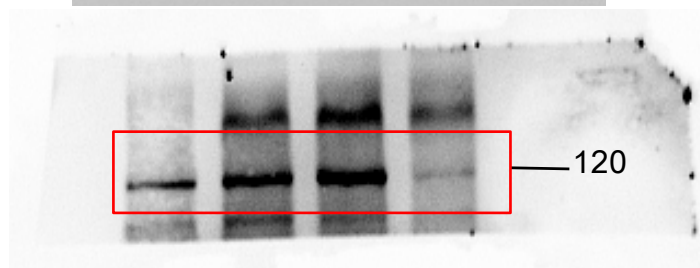

$\beta$ -tubulin

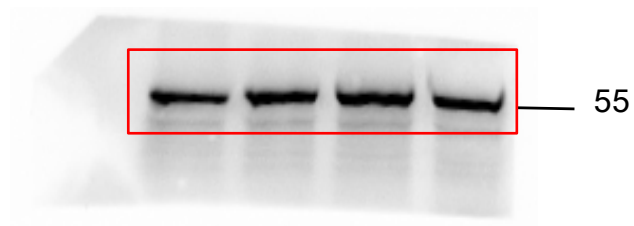

Figure S10A

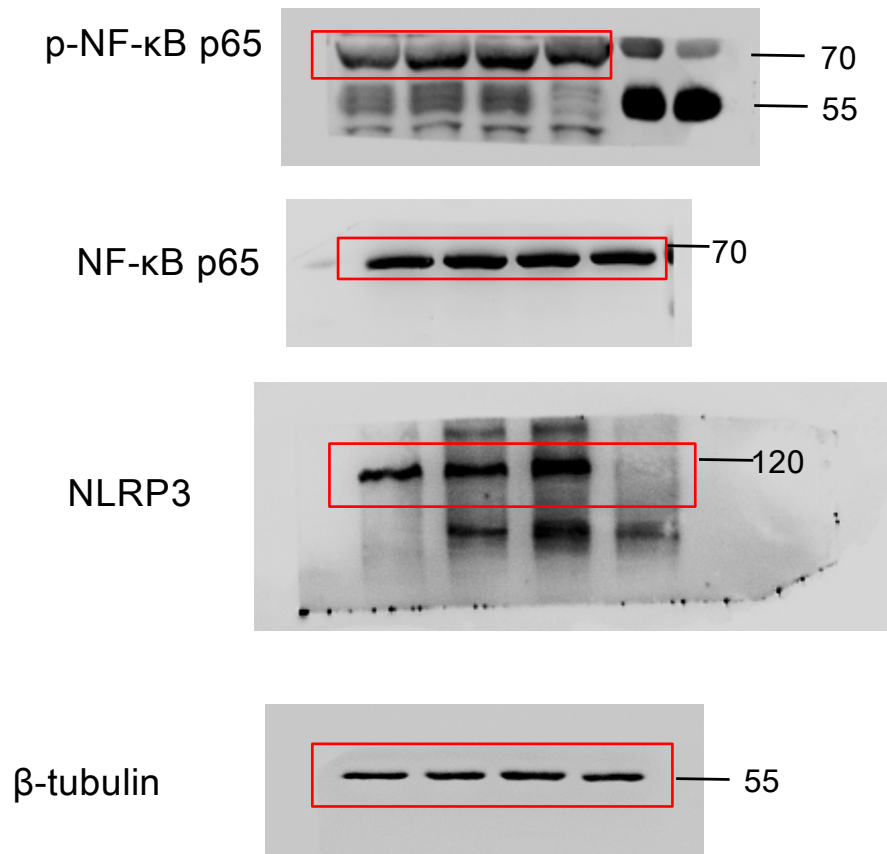

Figure S10B
